# Supplementary material for: Th2 cytokine bias induced by silver nanoparticles in peripheral blood mononuclear cells of common bottlenose dolphins (Tursiops truncatus)
Source: PeerJ. 2018 Sep 17;6:e5432. doi: 10.7717/peerj.5432 (PMC6147119; doi:10.7717/peerj.5432)
Supplement: Supplemental Information 4 — The cPBMCs with 0 h incubation were used as control for the calculation of cytokine expression level by ΔΔCT method. In addition, the geometric means of two housekeeping genes (HKGs), glyceraldehyde 3-phosphate dehydrogenase (GAPDH) and β2-microglobulin (B2M), of each samples were determined and used to normalize the the expression levels of target genes. The numbers in the sheet were the expression levels. [file peerj-06-5432-s005.xlsx]

## Sheet: IL-2
0hr	4hr	8hr	12hr	16hr	20hr	24hr
1	505.226	143.965	18.9955	11.6114	7.45896	10.5964
1	166.053	52.5243	17.844	3.53822	3.15231	4.15863
1	266.502	112.931	48.6574	27.4327	16.2723	19.868
1	367.416	91.999	33.246	25.6042	10.9939	29.198

## Sheet: IL-4
0hr	4hr	8hr	12hr	16hr	20hr	24hr
1	2109.19	1735.44	630.341	360.663	335.805	313.44
1	536.71	535.563	677.87	251.693	219.627	163.269
1	314.738	363.12	347.191	158.719	119.168	157.028
1	808.314	364.821	365.85	257.479	246.618	173.982

## Sheet: IL-10
0hr	4hr	8hr	12hr	16hr	20hr	24hr
1	42.769	28.0382	8.6107	8.05438	5.36699	4.33472
1	21.0464	7.135	4.61031	1.0666	1.5464	1.38377
1	63.141	41.0498	11.914	2.23896	2.6424	3.20401
1	58.5368	13.7947	6.65809	3.33066	3.94803	2.60774

## Sheet: IL-12
0hr	4hr	8hr	12hr	16hr	20hr	24hr
1	100.953	30.5042	2.82119	0.94726	0.929376	0.643333
1	27.436	12.4659	3.29977	2.19318	2.72529	5.28209
1	22.208	12.5908	1.50221	0.939736	0.930996	1.2396
1	191.509	23.9349	5.1698	3.99531	3.53359	3.24405

## Sheet: IFN-gamma
0hr	4hr	8hr	12hr	16hr	20hr	24hr
1	101.432	43.0493	4.94208	15.7999	25.8494	22.6507
1	10.6886	2.60253	1.04237	0.577552	1.22384	0.708878
1	61.5209	38.5004	11.6285	5.1171	5.30314	8.47009
1	90.7466	17.2802	5.918	4.64542	7.78736	7.41424

## Sheet: TNF-alpha
0hr	4hr	8hr	12hr	16hr	20hr	24hr
1	105.135	18.2263	6.47405	5.37944	3.26371	3.69788
1	32.2337	5.40732	3.61718	2.82455	2.60072	7.73343
1	24.3864	21.7328	6.97449	2.88851	6.29561	8.06893
1	33.8544	6.92131	2.90816	3.21721	4.8354	4.77433
